# Supplementary material
Source: PubMed Central journal article supplement (PMC6393178)
Supplement: NIHMS1005258-supplement-Supp_FigS1.pdf [file NIHMS1005258-supplement-Supp_FigS1.pdf]

**Top 20 Enriched Pathways in DPT**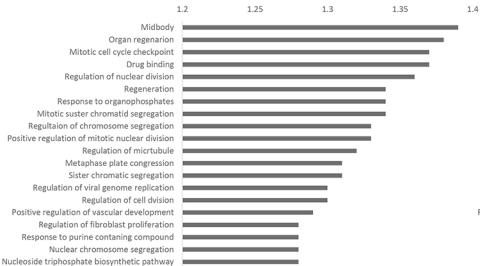**Top 20 Enriched Pathways in FT**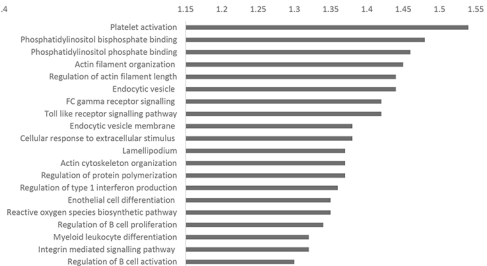

**Supplemental Figure 1 – Top 20 enriched pathways in DPT versus FT burn tissues as determined by RNA sequencing.** Top 20 pathways as determined by gene set enrichment analysis. The x-axis denotes the normalized enrichment score. DPT tissues had enrichment of pathways involved in regeneration, cellular division and proliferation. FT tissues had enrichment of pathways involved in inflammation.
